# Supplementary material for: Real time imaging of the growth of silver ribbons by evanescent wave microscopy
Source: Royal Society of Chemistry journal article supplement (doi:10.1039/c5ra13979a), 2015-01-01
Supplement: c5ra13979a2.pdf [file c5ra13979a2.pdf]

SUPPORTING INFORMATION FOR

**Real time imaging of the growth of silver ribbons by evanescent wave microscopy**

Angshuman Pal,<sup>a</sup> Panart Khajornrungruang,<sup>b</sup> and S. V. Babu<sup>a</sup>

<sup>a</sup> Center of Advance Materials Processing, Clarkson University Potsdam, NY, 13676 USA

<sup>b</sup> Dept. of Mechanical Information Science and Technology, Kyushu Institute of Technology, Iizuka-shi, Fukuoka, Japan

Supplementary figures:

S-1 and S-2

**S-1**

Length of the rectangular box (from optical image) is calculated by taking the average of several measurements (average length is 58.56  $\mu\text{m}$ ). Length of the rectangular box (evanescent image) is calculated by pixels measurement. Then scale bar is introduced: 13.37 pixel = 1  $\mu\text{m}$ .

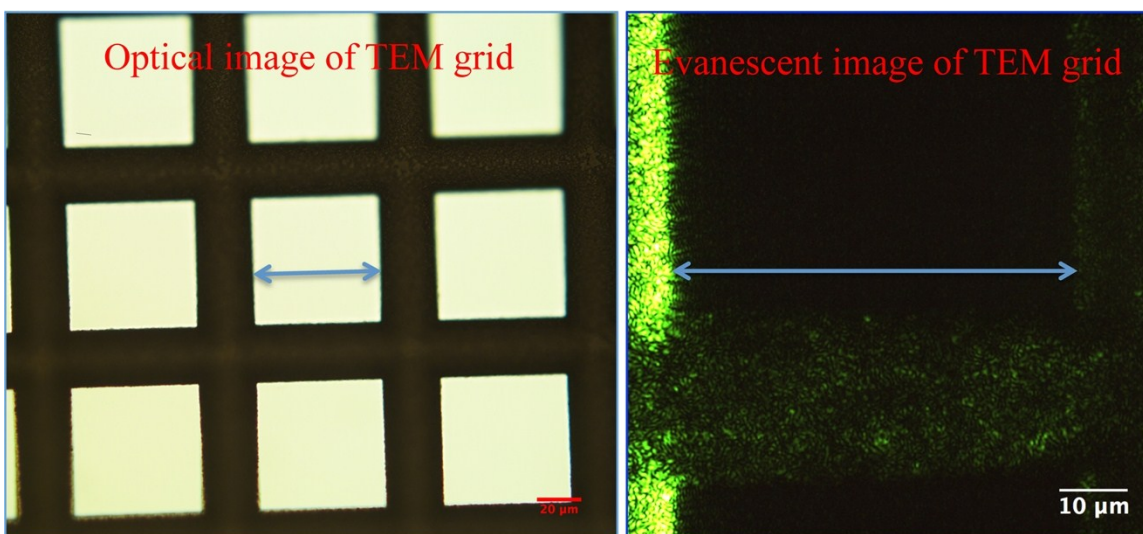

**S-2**

Media file (4 s video of silver ribbon's growth) attached separately.
